RESEARCH ARTICLE

# Transcriptome sequencing reveals novel *Citrus bark cracking viroid* (CBCVd) variants from citrus and their molecular characterization

Yafei Wang<sup>1,2</sup>, Sagheer Atta<sup>3</sup>, Xuefeng Wang<sup>1,2</sup>, Fangyun Yang<sup>1</sup>, Changyong Zhou<sup>1,2\*</sup>, Mengji Cao<sup>1,2\*</sup>

**1** National Citrus Engineering Research Center, Citrus Research Institute, Southwest University, Chongqing, China, **2** Academy of Agricultural Sciences, Southwest University, Chongqing, China, **3** Department of Plant Protection, Faculty of Agricultural Sciences, Ghazi University, Dera Ghazi Khan, Pakistan

\* [caomengji@cric.cn](mailto:caomengji@cric.cn) (MC); [zhoucy@cric.cn](mailto:zhoucy@cric.cn) (CZ).

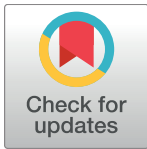

**OPEN ACCESS**

**Citation:** Wang Y, Atta S, Wang X, Yang F, Zhou C, Cao M (2018) Transcriptome sequencing reveals novel *Citrus bark cracking viroid* (CBCVd) variants from citrus and their molecular characterization. PLoS ONE 13(6): e0198022. <https://doi.org/10.1371/journal.pone.0198022>

**Editor:** Rajesh Mehrotra, Birla Institute of Technology and Science, INDIA

**Received:** December 23, 2017

**Accepted:** May 11, 2018

**Published:** June 11, 2018

**Copyright:** © 2018 Wang et al. This is an open access article distributed under the terms of the [Creative Commons Attribution License](https://creativecommons.org/licenses/by/4.0/), which permits unrestricted use, distribution, and reproduction in any medium, provided the original author and source are credited.

**Data Availability Statement:** All relevant data are available from the GenBank database with the following accession number(s): MG457777-MG457798.

**Funding:** This work was financially supported by grants from the Intergovernmental International Science, Technology and Innovation (STI) Collaboration Key Project of China's National Key R&D Programme (NKP) (2017YFE0110900), National Natural Science Foundation of China (31501611, 31000843), Fundamental Research

## Abstract

*Citrus bark cracking viroid* (CBCVd), previously called *Citrus viroid IV*, belongs to the genus *Cocadviroid* within the family *Pospiviroidae*. CBCVd has been identified as an important causative agent in citrus and hops. In this study, we obtained the full-length genomes of different variants of all detected citrus viroids from Pakistan through transcriptome sequencing. Different CBCVd variants were first found in Pakistan. These newly discovered Pakistani CBCVd variants were provisionally called “CBCVd-LSS” for their low sequence similarity (80.9%–88.9%) with the CBCVd RefSeq sequence (NC\_003539). The two most predominant CBCVd sequences from Pakistan had the closest identity, 90.6% and 87.9%, with two CBCVd sequences isolated from hops. Identification and molecular characterization of CBCVd from citrus in Pakistan and China were also reported. The length of CBCVd from China ranged from 282 to 286 nucleotides, while that of the one from Pakistan ranged from 273 to 277 nucleotides. Based on genetic diversity and phylogenetic analysis, two main CBCVd clades were identified. CBCVd sequences from Pakistan, China, and other countries were further divided into six sub-clades. Sequence alignment revealed some nucleotide changes between these sub-clades, and analysis indicated that several mutations could significantly affect the primary and secondary structure of the viroid. Our results indicated that the CBCVd sequences from Pakistan and China were significantly different with respect to genome and secondary structure and Pakistan might be one of the independent geographical origins of CBCVd worldwide.

## Introduction

Viroids, the known smallest pathogens, are closed-loop, single-stranded RNA molecules of 246–401 nucleotides (nt) [1, 2]. Eight viroid species of the family *Pospiviroidae*: *Citrus exocortis viroid* (CEVd), *Citrus bent leaf viroid* (CBLVd), *Hop stunt viroid* (HSVd), *Citrus dwarfing viroid*

Funds for the Central Universities (XDJK2018AA002, XDJK2016B021, SWU116012), Chongqing Research Program of Basic Research and Frontier Technology (cstc2017jcyjBX0016). The funders had no role in study design, data collection and analysis, decision to publish, or preparation of the manuscript.

**Competing interests:** The authors have declared that no competing interests exist.

(CDVd), *Citrus bark cracking viroid* (CBCVd), *Citrus viroid V* (CVd-V), *Citrus viroid VI* (CVd-VI) and *Citrus viroid VII* (CVd-VII) have been found on citrus trees [3–6].

CBCVd was formerly known as *Citrus viroid IV* (CVd-IV). It is located in the nucleus and its rod-shaped secondary structure has a central conserved region (CCR) and a terminal conserved hairpin (TCH). CVd-IV has been associated with severe bark cracking of trifoliolate and trifoliolate citrus hybrids and it was renamed as CBCVd according to its symptoms on trifoliolate orange [7]. CBCVd has been identified as a critical component of citrus viroid mixtures that can induce severe exocortis-like bark scaling symptoms on trifoliolate orange rootstock with no CEVd [8, 9]. CBCVd has a broad host range among citrus, citrus relatives, and citrus hybrids as well as herbaceous hosts such as cucumber, tomato, eggplant, datura, chrysanthemum, and gynura [10]. Recently, it has been also reported that plant growth and crop yield will be significantly affected when hops (*Humulus lupulus* L.) are infected with CBCVd [11, 12]. CBCVd can cause severe stunting disease in hops, which is one of the most devastating diseases in this plant [11, 12].

The Pakistani region is an important citrus cultivation area in the world. However, due to the special geographical location, the study of citrus viroids in the region is not sufficient. The occurrence of the CBCVd has never been reported in Pakistan where CEVd, CBLVd, HSVd, CDVd and CVd-V have been detected in citrus [13, 14]. Fortunately, our lab had a rich collection of citrus samples from Pakistan in the past decade. An overall analysis of citrus viroids in Pakistan will help us understand the occurrence of viroid conditions in the Pakistani region and may lead to the discovery of new viroids. In China, many citrus species have been imported from other countries such as Japan. However, information on the existence of CBCVd in these introductions is still pending.

In recent years, next-generation sequencing (NGS) platforms combined with bioinformatics analysis methods have been widely used in viroid research and diagnosis for viroid discovery, detection, and viroid-host interactions [15–18]. The utilization of NGS in viroid research has led to the discovery of new viroids, such as *Grapevine latent viroid* and *Persimmon viroid 2* [19, 20]. Hops infected with CBCVd variants and fig trees infected with *Apple dimple fruit viroid* were also discovered with the help of NGS [11, 21]. NGS has also provided an alternative method of identifying viroids in citrus cultivars. Here, the identification of different viroids using transcriptome sequencing from citrus plants is described and the novel CBCVd variants found in citrus cultivars were further assessed using RT-PCR analysis. We further described molecular characterization of CBCVd variants from citrus in Pakistan and China. Sequence diversity and the phylogenetic relationship of the CBCVd isolates from different regions are also reported here. The secondary structures of different CBCVd sequences were also here analyzed in this study.

## Materials and methods

### Ethics statement

All experimental citrus materials were collected from the greenhouse of National Citrus Engineering Research Center, Citrus Research Institute, Southwest University, in Beibei District, Chongqing municipality, China. There was no specific permission required for these collection activities because only a preliminary investigation of the disease status of the preserved citrus materials was undertaken. We confirmed that the collection did not involve endangered or protected species.

### Plant materials

All citrus samples were collected from May 2008 to April 2017 in main citrus-growing regions of Punjab Province, Pakistan and Zhejiang Province, China. In total, 93 and 184 citrus samples

from Pakistan and China were collected, respectively. Budwoods from these samples were grafted onto rough lemon rootstocks and nurtured in the pest-control greenhouse of National Citrus Engineering Research Center, Chongqing, China.

### Transcriptome sequencing and bioinformatics analysis

Total RNA was extracted using the EASY spin Plus Complex Plant RNA Kit (Aidlab Biotech, Beijing, China). The transcriptome libraries were constructed from two rRNA-depleted libraries using a TruSeq RNA-seq Sample Preparation Kit (Illumina, San Diego, CA, US). The libraries were sequenced using an Illumina HiSeq X-ten platform with a paired-end 150 bp set-up. Two sets of sequences, PCV-I and PCV-II, were finally obtained. PCV-I library had 43 Pakistani samples and PCV-II library had the other 40 Pakistani samples. We collected approximately 25G transcriptomic data for analysis from PCV-I and PCV-II, respectively. All raw sequences were used for mapping to the reference genomes of sweet orange (*C. sinensis*) [22] and clementine (*C. clementina*) [23] to remove the reads originating from hosts using CLC Genomics Workbench 9.5 (Qiagen, Denmark). The remaining reads were *de novo* assembled into contigs (transcripts) with the minimum of 200 nt and then used for BLASTN searches against an all-viroid-sequence database.

### RT-PCR, cloning, and sequencing

All the samples from Pakistan and China were analyzed in the usual fashion, by RT-PCR. Primer pairs of CBCVd (CBCVd-F: 5'-GGGGAAATCTCTTCAGAC-3', CBCVd-R: 5'-GGGGATCCCTCTTCAGGT-3') [24], which were previously reported, were used to amplify CBCVd from these samples. RT-PCR products were first confirmed using direct sequencing and then cloned into pGEM-T Easy Vector (Promega, China) according to the manufacturer's instructions. The insert was transferred into *Escherichia coli* DH5 $\alpha$  cells. Recombinant DNA clones containing inserts of the expected size were identified by PCR. At least 15 clones were randomly chosen from every CBCVd isolate and sent to TsingKe (Chengdu, China) for sequencing.

### Genetic diversity, phylogenetic analysis, and determination of secondary structures

The program Clustal W was used to perform the alignment of multiple sequences. Genetic distance analysis about CBCVd isolates was performed using the MEGA 6 software with the Jukes-Cantor Model. Phylogenetic analysis was performed using maximum likelihood phylogeny with 1000 bootstrap replications. Values below 70% were cut off. The MFOLD web server and RNAviz program were used to obtain stable secondary structure. Sequences from this study and other sequences obtained from GenBank were used in the analysis (S1 Table).

## Results

### Pathogen identification

The Illumina sequencing generated 244,781,032 and 223,983,226 raw paired-end 150 bp reads for PCV-I and PCV-II libraries, respectively. After mapping to two high-quality reference genomes of hosts, 39,861,968 and 37,884,631 unmapped reads were obtained from PCV-I and PCV-II libraries, respectively. These unmapped reads were *de novo* assembled into contigs with a minimum length of 200 nt. Finally, 29,499 and 30,501 contigs were generated and used for BLASTN searches. BLASTN searches revealed the presence of contigs of six different citrus viroids except CVd-VI and CVd-VII in both samples. The full genomes of six viroids including CEVd, CBLVd, HSVd, CDVd, CBCVd, and CVd-V were obtained from PCV-I and PCV-II

libraries. Different contigs of these citrus viroids were also found in PCV-I and PCV-II libraries by transcriptome sequencing and BLASTN searches. Finally, we found one CEVd contig, one CBLVd contig, one CVd-I-LSS contig, one HSVd contig, two CDVd contigs, one CBCVd contig, and two CVd-V contigs in the PCV-I library. And we obtained one CEVd contig, one CBLVd contig, one HSVd contig, two CDVd contigs, one CBCVd contig and one CVd-V contig from the PCV-II library. Two CBCVd contigs were found in the PCV-I and PCV-II libraries, with an assembled length of 277 and 276 nt, respectively. Average coverage of reads mapping for these contigs were 19.43–394.38 and 20.84–627.66 in the PCV-I and PCV-II libraries, respectively (Table 1).

### Confirmation and analysis of CBCVd from Pakistan

An RT-PCR screening assay for CBCVd from Pakistan was also performed and the results showed that 6 out of 93 samples were CBCVd-positive. Cloning and sequencing of the RT-PCR products showed the presence of Pakistani CBCVd variants, and their genomes were subsequently confirmed. A sequence was considered to be the predominant sequence if it appeared twice or more in the same host. Based on these data, it was speculated that at least eight Pakistani CBCVd sequences were predominant. One predominant CBCVd sequence (P3-1, Accession number: MG457780) found in PCV-I and another predominant CBCVd sequence (P5-1, Accession number: MG457778) found in PCV-II were the two most predominant sequences. Our results also showed the lengths of P3-1 and P5-1 to be 277 nt and 276 nt, respectively. P3-1 and P5-1 had only 88.5% and 86.2% nucleotide sequence identity with the CBCVd RefSeq sequence (NC\_003539), respectively, and 95.0% nucleotide sequence identity with each other. Total read count and average coverage of reads mapped onto sequences of CBCVd-P3-1 and P5-1 were 118, 62.94 and 39, 20.84 in the PCV-I and PCV-II libraries, respectively (Fig 1).

### Genetic diversity of CBCVd isolates from Pakistan and China

In order to confirm whether there were similar CBCVd isolates in China, we further analyzed citrus samples from Pakistan and China using RT-PCR. Finally, six CBCVd isolates (P1–P6)

**Table 1. Blast results of contigs for samples (PCV-I, PCV-II, respectively) against viroid sequences available in NCBI.**

| Sample | Accession number | Reference name | Reference length | Contig name  | Contig length | Identity (%) | Total read count | Average coverage |
|--------|------------------|----------------|------------------|--------------|---------------|--------------|------------------|------------------|
| PCV-I  | KC290927.1       | CEVd           | 371              | Contig-412   | 371           | 99           | 511              | 204.85           |
|        | FJ773267.1       | CBLVd          | 328              | Contig-5366  | 327           | 99           | 43               | 19.43            |
|        | KF726094.1       | CVd-I-LSS      | 328              | Contig-5367  | 328           | 98           | 151              | 69.01            |
|        | AY594203.1       | HSVd           | 299              | Contig-1830  | 299           | 99           | 795              | 394.38           |
|        | FJ773277.1       | CDVd           | 293              | Contig-8134  | 293           | 99           | 94               | 47.96            |
|        | AB054619.1       | CDVd           | 294              | Contig-8135  | 294           | 100          | 249              | 126.95           |
|        | KM211546.1       | CBCVd          | 284              | Contig-6751  | 277           | 91           | 118              | 62.94            |
|        | JQ348927.1       | CVd-V          | 293              | Contig-818   | 293           | 100          | 476              | 240.59           |
| PCV-II | AB560862.1       | CVd-V          | 294              | Contig-820   | 294           | 99           | 219              | 111.15           |
|        | FJ904297.1       | CEVd           | 371              | Contig-4665  | 371           | 100          | 126              | 50.23            |
|        | KM214213.1       | CBLVd          | 327              | Contig-7695  | 327           | 100          | 558              | 254.68           |
|        | HE662806.1       | HSVd           | 299              | Contig-4624  | 300           | 97           | 244              | 120.54           |
|        | AJ630358.1       | CDVd           | 294              | Contig-2719  | 294           | 99           | 196              | 98.98            |
|        | AF447788.1       | CDVd           | 292              | Contig-2720  | 292           | 99           | 112              | 57.44            |
|        | KM211547.1       | CBCVd          | 284              | Contig-12528 | 276           | 88           | 39               | 20.84            |
|        | EF617306.1       | CVd-V          | 294              | Contig-902   | 294           | 99           | 1237             | 627.66           |

<https://doi.org/10.1371/journal.pone.0198022.t001>

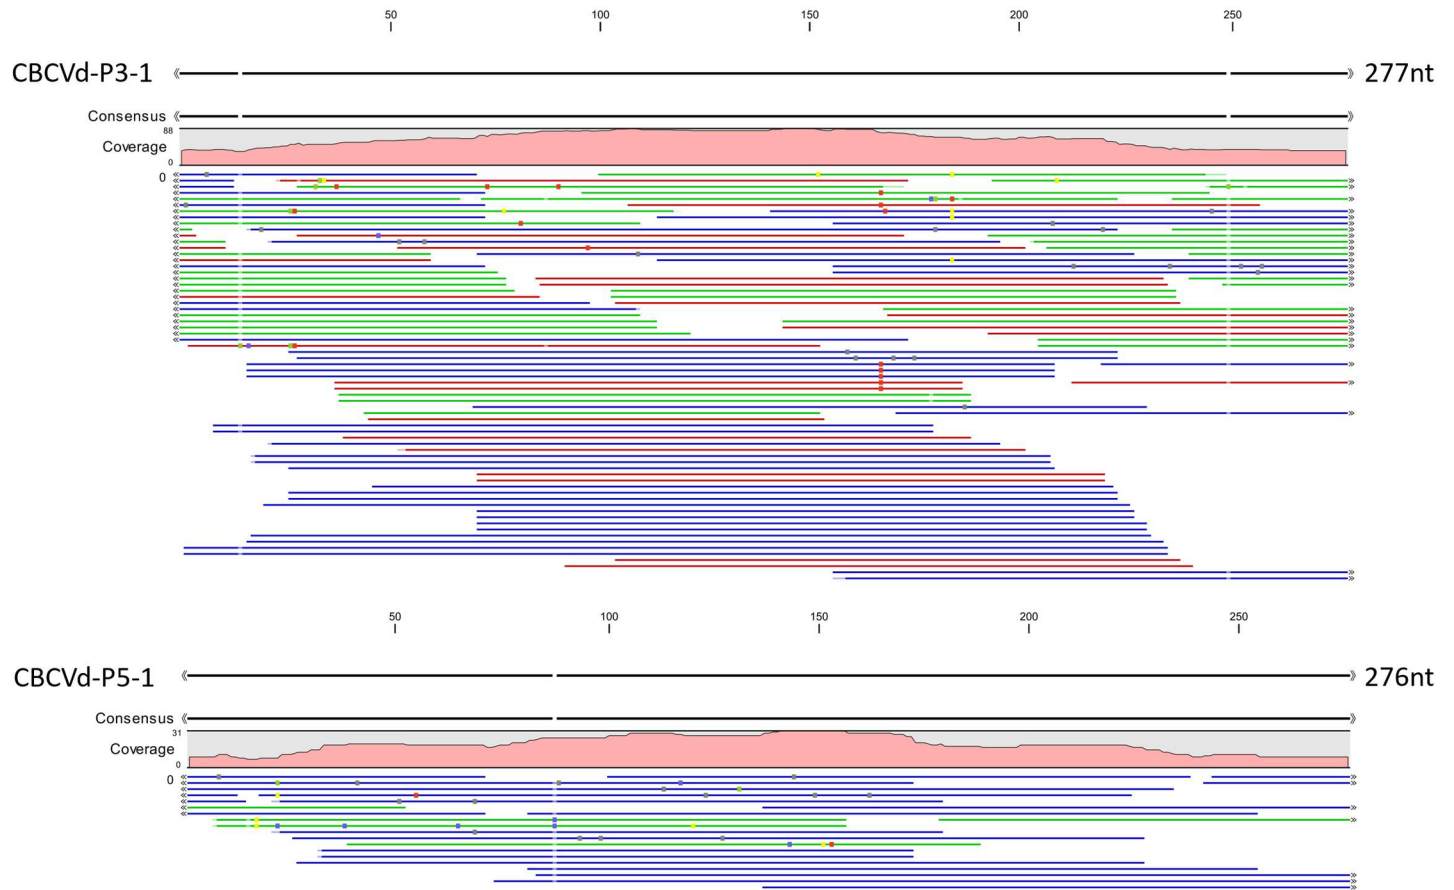

**Fig 1. Transcriptome reads mapped onto sequences of CBCVd-P3-1 (A) and P5-1 (B) in PCV-I and PCV-II libraries. Dots represent mismatches of reads.**

<https://doi.org/10.1371/journal.pone.0198022.g001>

from Pakistan and eight CBCVd isolates (C1–C8) from China were found. These CBCVd isolates were amplified by RT-PCR and at least 15 cDNA clones were randomly selected from each of the 14 CBCVd isolates for sequencing. We performed PCR amplification using high-fidelity polymerase to minimize errors and confirmed the mutations in different clonal sequences to ensure they were consistent. Sequencing analysis showed the length of CBCVd sequences in Pakistan and China to be 272–277 nt and 282–286 nt, respectively (Table 2). These Pakistani CBCVd sequences had only 80.9% to 88.9% nucleotide sequence similarities to the CBCVd RefSeq sequence (NC\_003539). The nucleotide sequence similarities among the Pakistani and Chinese isolates were 88.5–100% and 90.6–100%, respectively.

The genetic diversity was further analyzed using 264 CBCVd sequences obtained in this study and 26 other CBCVd sequences including two sequences from the hop available in the NCBI. All of these sequences were small, hand-trimmed, and aligned by the Clustal W program. Finally, 292 nucleotide sites were found. Of the 155 variable sites obtained, there were 74 and 81 parsimoniously informative singletons. Two or more clones had the same mutation in parsimoniously informative sites. Twenty-two predominant CBCVd sequences from Pakistan and China were obtained. The genetic diversity of the Pakistani CBCVd population was  $0.027 \pm 0.006$ , which was higher than the Chinese population ( $0.026 \pm 0.005$ ) and other countries' population ( $0.022 \pm 0.005$ ). When all the CBCVd sequences were considered regardless of geographic regions, the nucleotide diversity was  $0.052 \pm 0.010$  (Table 3).

**Table 2. Genomic diversity of citrus bark cracking viroid (CBCVd) isolates from Pakistan and China.**

| Name | Original host    | No. of clones sequenced | Predominant sequence | Singleton sequence | C   | V  | Pi | S  | N           | Length (nt)        |
|------|------------------|-------------------------|----------------------|--------------------|-----|----|----|----|-------------|--------------------|
| P1   | Mosambi          | 19                      | 2                    | 11                 | 253 | 23 | 1  | 22 | 0.011±0.003 | 273, 276           |
| P2   | Saccari          | 19                      | 2                    | 11                 | 260 | 17 | 3  | 14 | 0.008±0.002 | 275, 276, 277      |
| P3   | Feutrell's Early | 18                      | 1                    | 10                 | 267 | 10 | 1  | 9  | 0.005±0.002 | 275, 276, 277      |
| P4   | Saccari          | 20                      | 1                    | 16                 | 248 | 29 | 2  | 27 | 0.012±0.002 | 275, 276, 277      |
| P5   | Mosambi          | 20                      | 1                    | 13                 | 257 | 19 | 1  | 18 | 0.008±0.002 | 273, 275, 276, 277 |
| P6   | Mosambi          | 16                      | 1                    | 13                 | 258 | 19 | 6  | 13 | 0.014±0.004 | 275, 276, 277      |
| C1   | Oostu No.4       | 23                      | 2                    | 18                 | 262 | 24 | 9  | 15 | 0.014±0.004 | 284, 285, 286      |
| C2   | Shiranuhi        | 16                      | 1                    | 12                 | 268 | 18 | 4  | 14 | 0.011±0.003 | 283, 284, 286      |
| C3   | Katsuyama Iyokan | 18                      | 1                    | 10                 | 271 | 13 | 1  | 12 | 0.006±0.001 | 282, 284, 285      |
| C4   | Yura             | 18                      | 3                    | 10                 | 268 | 18 | 5  | 13 | 0.011±0.003 | 282, 284, 285, 286 |
| C5   | Akemi            | 16                      | 2                    | 9                  | 264 | 22 | 10 | 12 | 0.019±0.004 | 284, 286           |
| C6   | Nishirkaori      | 26                      | 2                    | 21                 | 264 | 22 | 10 | 12 | 0.013±0.003 | 283, 284, 285, 286 |
| C7   | Akemi            | 16                      | 2                    | 10                 | 258 | 26 | 1  | 25 | 0.013±0.003 | 282, 283, 284, 285 |
| C8   | Nishirkaori      | 19                      | 1                    | 15                 | 266 | 20 | 5  | 15 | 0.010±0.003 | 284, 286           |

C, conserved sites; V, variable sites; Pi, parsimonious informative nucleotide sites; S, singleton sites; N, nucleotide diversity

<https://doi.org/10.1371/journal.pone.0198022.t002>

### Phylogenetic analysis of CBCVd

The phylogenetic relationships of the CBCVd sequences were analyzed using the 8 predominant CBCVd sequences from Pakistan and 14 predominant CBCVd sequences from China obtained in this study and 26 other CBCVd sequences available in the NCBI. The 48 CBCVd sequences in the phylogenetic tree were separated into two major clades according to geographical regions. Chinese CBCVd sequences were placed in the largest clade while Pakistani CBCVd sequences were placed in the other clade. Phylogenetic analysis showed that Pakistani CBCVd sequences formed an individual clade distinct from the other clade. No intermediate CBCVd sequences were able to connect Pakistani CBCVd sequences and the CBCVd sequences from other countries, including China. The CBCVd sequences were further separated into sub-clades A, B, C, D, E, and F with sequence homology of less than 97.0% between each two sub-clades (Fig 2).

### Secondary structure analysis of putative CBCVd groups

The most predominant sequences were selected from every sub-clade for secondary structure analysis of putative CBCVd groups. The terminal conserved hairpin (TCH) (<sup>280</sup>CCCCUCUGGGGA<sup>8</sup>)

**Table 3. Nucleotide diversity of citrus bark cracking viroid (CBCVd) sequences from Pakistan, China, and other countries.**

| Origin   | Original host | No. of isolates examined | No. of clones sequenced | C <sup>b</sup> | V <sup>c</sup> | Pi <sup>d</sup> | S <sup>e</sup> | N <sup>f</sup> |
|----------|---------------|--------------------------|-------------------------|----------------|----------------|-----------------|----------------|----------------|
| Pakistan | Citrus        | 6                        | 112                     | 190            | 89             | 28              | 61             | 0.027±0.006    |
| China    | Citrus        | 8                        | 150                     | 189            | 98             | 36              | 62             | 0.026±0.005    |
| Others   | Citrus, Hop   | 26                       | 26                      | 260            | 26             | 17              | 9              | 0.022±0.005    |
| All      | Citrus, Hop   | 40                       | 288                     | 137            | 155            | 74              | 81             | 0.052±0.010    |

<sup>a</sup> other countries including Japan, Cuba, Iran, South Africa, Greece, Slovenia, Cyprus and Israel;

<sup>b</sup> conserved sites;

<sup>c</sup> variable sites;

<sup>d</sup> parsimonious informative nucleotide sites;

<sup>e</sup> singleton sites;

<sup>f</sup> nucleotide diversity

<https://doi.org/10.1371/journal.pone.0198022.t003>



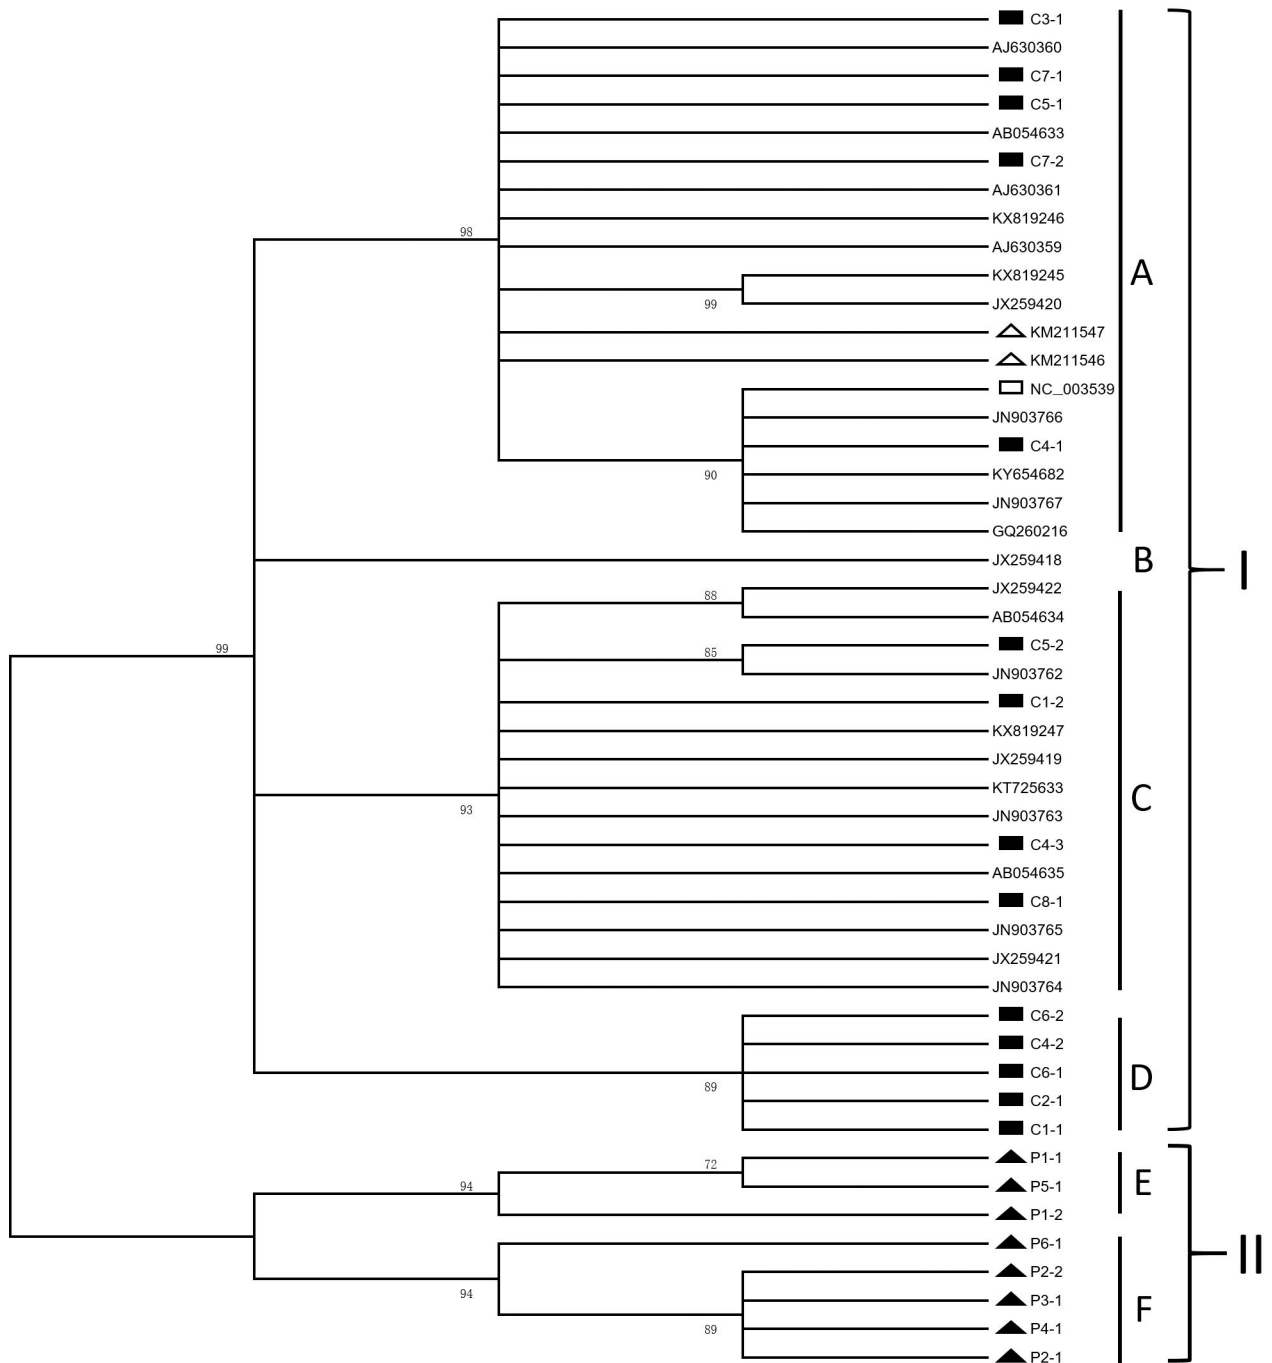

**Fig 2. Phylogenetic analysis of citrus bark cracking viroid (CBCVd) sequences.** The phylogenetic tree was constructed with genomic sequences of 8 Pakistani CBCVd sequences (indicated by solid triangle), 14 Chinese CBCVd sequences (indicated by solid rectangle), and 26 CBCVd sequences including two variant sequences on hop (indicated by hollow triangle) and the CBCVd RefSeq sequence (indicated by hollow rectangle) available in GenBank. Values below 70% were cut off.

<https://doi.org/10.1371/journal.pone.0198022.g002>

and central conserved region (CCR) (<sup>59</sup>GAGGGAUCCCCGGGAAA<sup>76</sup> and <sup>210</sup>ACUACCCGGUGG AUACAACUC<sup>230</sup>) were conserved in all CBCVd sequences. In the secondary structure, the mutations (G<sup>16</sup>→U, G<sup>18</sup>→A, and<sup>20</sup>-U) in sub-clade D extended one loop and the deletion of<sup>10</sup>U reduced the other loop. Compared to the CBCVd RefSeq sequence (NC\_003539), three-stage stable





viroids [18, 25]. Notably, sRNA deep sequencing has been widely adopted to detect plant viroid [11, 21]. Previous studies have shown that the rRNA-depleted total RNA method is generally more effective than the sRNA method when reassembling sequencing reads [25]. However, there are few reports on the identification of new viroids by transcriptome sequencing. In this study, deep sequencing of rRNA-depleted total RNA firstly helped us in obtaining the full-length genomes of all detected known citrus viroids including CEVd, CBLVd, HSVd, CDVd, CBCVd, and CVd-V from Pakistani samples. The different contigs of these citrus viroids were also identified and we found two or more contigs for each detected viroid using deep sequencing of rRNA-depleted total RNA and BLASTN searches. These results demonstrated the advantage of transcriptome sequencing that allows simultaneous identification of some different viroids from various samples. This identification method, focusing on transcriptome sequencing, has been proved to be a useful tool in citrus viroid diagnostics.

This study reported the identification of CBCVd in Pakistan, where this pathogen was found for the first time. We also got the Pakistani CBCVd sequences, which differed from the reported CBCVd sequences. Two most predominant CBCVd sequences (P3-1 and P5-1) from Pakistan had the highest identity (90.6% and 87.9%) with two CBCVd sequences (Accession number in NCBI: KM211546 and KM211547) isolated from hops. These novel Pakistani CBCVd sequences were temporarily named “CBCVd-LSS” (tentative acronym) because they have low sequence similarity (80.9%–88.9%) to the CBCVd RefSeq sequence (NC\_003539). The level of 90% sequence similarity was usually the definitive boundary that differentiates strains and species [26, 27]. In case of the CBCVd-LSS and CBCVd sequences, it was difficult to distinguish them from each other with only nucleotide sequence homology. We did not find intermediate sequences that connected the populations of Pakistani CBCVd sequences to those of CBCVd sequences from other countries in this study. Because of the discontinuity in genomic variation between CBCVd-LSS and CBCVd, we thought CBCVd-LSS might be a new species, distinct from CBCVd. More likely, CBCVd-LSS was only a unique strain of CBCVd. In this way, more work is needed to accurately classify CBCVd-LSS and CBCVd. Biological properties of CBCVd-LSS will need to be determined in the following study. If there is no difference in the biological characteristics (host range, symptoms) between CBCVd-LSS and CBCVd, CBCVd-LSS can be considered a unique strain of CBCVd.

In the past, no CBCVd was detected in Pakistan, probably because of the low occurrence frequency and high variation frequency of the Pakistani CBCVd isolates. The fact that there were several sequence variations between CBCVd-LSS and CBCVd sequences in the vicinity of the primers explains why no specific products were obtained by RT-PCR in previous studies [13, 14, 28]. Similarly, the presence of the same nucleotide sequence in the primer region explains why the primer pair used in this study could be amplified by RT-PCR to produce specific fragments of CBCVd-LSS and CBCVd. CBCVd was identified with a low incidence in Pakistan (6 of 93) and in China (8 of 184) in this study. CBCVd has also been detected in Israel, Japan, Greece, and other countries [8, 29, 30]. According to existing reports, citrus varieties and hops are important hosts of CBCVd. Severe crack symptoms were observed in sensitive rootstocks when the rootstocks were infected by mixed viroids even with no CEVd [8, 9]. Infection with CBCVd, especially coinfections with other viroids, could result in substantial losses of citrus production. In addition, CBCVd could seriously affect the growth of hops and cause major losses. For this reason, removal of CBCVd should be considered in the breeding of citrus and hops.

So far, the molecular characteristics and evolutionary analysis of several citrus viroids have been reported [14, 28, 31–33]. In this study, CBCVd-LSS was detected in six citrus cultivars from Pakistan. Eight citrus cultivars with CBCVd from China were also detected. The high-fidelity DNA polymerase was used in PCR amplification to ensure that the mutations detected

in this study were all from natural mutations. Genetic analysis of CBCVd variants showed the genetic diversity of CBCVd sequences from Pakistan to be more pronounced than that from other countries. Phylogenetic analysis showed that the CBCVd sequences from Pakistan and China were located in different clades. This is the first report that CBCVd sequences from Pakistan were grouped according to the geographic origin. In addition, the CBCVd variants from other Asian countries such as Japan, Iran and Israel were all placed in the clade I, indicating that there were few differences among these CBCVd variants. And the genetic distance between these CBCVd variants and Chinese CBCVd variants was also very close. Although these Asian countries, especially Iran, were close to Pakistan, there were significant differences between the CBCVd sequences from these regions and the Pakistani CBCVd sequences. Sequence analysis showed that few mutations were presented on the CBCVd variants in sub-clades A, B, C, and D, indicating a close relationship among these sub-clades. The eight Chinese cultivars infected with CBCVd were originally imported from other countries such as Japan. These CBCVd variants in sub-clades A, B, C, and D might have the same ancestors. Our results also showed Pakistani CBCVd sequences to differ significantly from the CBCVd sequences from China and other countries. The results of these genetic diversity and phylogenetic analysis indicated that Pakistan might be one of the independent geographical origins of CBCVd worldwide.

By analyzing the putative secondary structures of different CBCVd sequences, sequence variations found in this study were found to affect the viroid structures. Our analysis also suggested that some nucleotide changes were responsible for the structural differences between the CBCVd-LSS sequences and the reference CBCVd sequence. The sequences of CBCVd-LSS were also different and the variations between these sequences also changed CBCVd-LSS structures. Some nucleotide changes in certain regions were also found to cause some other nucleotides changed at complementary positions. The accumulation of these unusual changes eventually separated the CBCVd-LSS and CBCVd populations from each other. Previous studies have suggested that the major functional motifs of viroids were the loops and bulges in their rod-like secondary structures [34]. Some of the changes identified in this study significantly affected the morphology of the secondary structure of the viroids, which suggests that these changes are likely to affect their virulence. The biological effect of these changes will be determined by further infectivity assays.

In conclusion, our study identified and provided an initial characterization of novel Pakistani CBCVd variants here called “CBCVd-LSS” on citrus cultivars by transcriptome sequencing. They are named for their low sequence similarity to the CBCVd RefSeq sequence (NC\_003539). We also reported the molecular characterization of CBCVd from citrus in China and found that the CBCVd sequences from China and Pakistan differed significantly in genome and secondary structure. Based on genetic diversity and phylogenetic analysis, we deduced that Pakistan might be one of the independent geographical origins of CBCVd worldwide.

## Supporting information

**S1 Table. The basic information of *citrus bark cracking viroid* (CBCVd) sequences obtained from this study and GenBank.**

(DOC)

## Acknowledgments

We would like to thank LetPub (<http://www.letpub.com>) for providing linguistic assistance during the preparation of this manuscript. We also thank Yong Zeng (National Citrus Engineering Research Center, Citrus Research Institute, Southwest University) for his technical assistance.

## Author Contributions

**Conceptualization:** Yafei Wang, Mengji Cao.

**Formal analysis:** Yafei Wang, Mengji Cao.

**Funding acquisition:** Xuefeng Wang, Changyong Zhou, Mengji Cao.

**Investigation:** Yafei Wang, Mengji Cao.

**Methodology:** Yafei Wang, Mengji Cao.

**Project administration:** Mengji Cao.

**Resources:** Sagheer Atta, Fangyun Yang.

**Software:** Mengji Cao.

**Supervision:** Changyong Zhou, Mengji Cao.

**Validation:** Yafei Wang.

**Visualization:** Yafei Wang, Mengji Cao.

**Writing – original draft:** Yafei Wang.

**Writing – review & editing:** Changyong Zhou, Mengji Cao.

## References

1. Ding B. The biology of viroid-host interactions. *Annu Rev Phytopathol.* 2009; 47(1):105–131. <https://doi.org/10.1146/annurev-phyto-080508-081927> PMID: 19400635.
2. Flores R, Hernández C, Alba AEMd, Daròs JA, Serio FD. Viroids and viroid-host interactions. *Annu Rev Phytopathol.* 2005; 43(1):117–139. <https://doi.org/10.1146/annurev-phyto.43.040204.140243> PMID: 16078879.
3. Chambers GA, Donovan NJ, Bodaghi S, Jelinek SM, Vidalakis G. A novel citrus viroid found in Australia, tentatively named *Citrus viroid VII*. *Arch Virol.* 2018; 163(1):215–218. <https://doi.org/10.1007/s00705-017-3591-y> PMID: 29027592.
4. Duranvila N, Roistacher CN, Riverabustamante R, Semancik JS. A definition of citrus viroid groups and their relationship to the exocortis disease. *J Gen Virol.* 1988; 69(12):3069–3080.
5. Ito T, Ieki H, Ozaki K, Ito T. Characterization of a new citrus viroid species tentatively termed *Citrus viroid OS*. *Arch Virol.* 2001; 146(5):975–982. PMID: 11448034
6. Serra P, Barbosa CJ, Daròs JA, Flores R, Duranvila N. *Citrus viroid V*: molecular characterization and synergistic interactions with other members of the genus *Apscaviroid*. *Virology.* 2008; 370(1):102–112. <https://doi.org/10.1016/j.virol.2007.07.033> PMID: 17900648.
7. Verniere C, Perrier X, Dubois C, Dubois A, Botella L, Chabrier C, et al. Citrus viroids: symptom expression and effect on vegetative growth and yield of clementine trees grafted on trifoliolate orange. *Plant Dis.* 2011; 88(11):1189–1197.
8. Ito T, Ieki H, Ozaki K, Iwanami T, Nakahara K, Hataya T, et al. Multiple citrus viroids in citrus from Japan and their ability to produce exocortis-like symptoms in citron. *Phytopathology.* 2002; 92(5):542–547. <https://doi.org/10.1094/PHYTO.2002.92.5.542> PMID: 18943029.
9. Vernière C, Perrier X, Dubois C, Dubois A, Botella L, Chabrier C, et al. Interactions between citrus viroids affect symptom expression and field performance of clementine trees grafted on trifoliolate orange. *Phytopathology.* 2006; 96(4):356–368. <https://doi.org/10.1094/PHYTO-96-0356> PMID: 18943417.
10. Semancik JS, Vidalakis G. The question of *Citrus viroid IV* as a *Cocadviroid*. *Arch Virol.* 2005; 150(6):1059–1067. <https://doi.org/10.1007/s00705-005-0499-8> PMID: 15821974.
11. Jakse J, Radisek S, Pokorn T, Matousek J, Javornik B. Deep-sequencing revealed *Citrus bark cracking viroid* (CBCVd) as a highly aggressive pathogen on hop. *Plant Pathol.* 2015; 64(4):831–842.
12. Mishra AK, Duraisamy GS, Matoušek J, Radisek S, Javornik B, Jakse J. Identification and characterization of microRNAs in *Humulus lupulus* using high-throughput sequencing and their response to *Citrus bark cracking viroid* (CBCVd) infection. *BMC Genomics.* 2016; 17(1):919–937. <https://doi.org/10.1186/s12864-016-3271-4> PMID: 27846797.

13. Cao MJ, Atta S, Liu YQ, Wang XF, Zhou CY, Mustafa A, et al. First report of *Citrus bent leaf viroid* and *Citrus dwarfing viroid* from citrus in Punjab, Pakistan. *Plant Dis.* 2009; 93(8):840.
14. Cao M, Atta S, Su H, Wang X, Wu Q, Li Z, et al. Molecular characterization and phylogenetic analysis of *Citrus viroid* V isolates from Pakistan. *Eur J Plant Pathol.* 2013; 135(1):11–21.
15. Martinez G, Donaire L, Llave C, Pallas V, Gomez G. High-throughput sequencing of *Hop stunt viroid*-derived small RNAs from cucumber leaves and phloem. *Mol Plant Pathol.* 2010; 11(3):347–359. <https://doi.org/10.1111/j.1364-3703.2009.00608.x> PMID: 20447283.
16. Hadidi A, Flores R, Candresse T, Barba M. Next-generation sequencing and genome editing in plant virology. *Front Microbiol.* 2016; 7(aaf5573):1325. <https://doi.org/10.3389/fmicb.2016.01325> PMID: 27617007.
17. Jiang J, Zhang Z, Hu B, Hu G, Wang H, Faure C, et al. Identification of a viroid-like RNA in a lychee transcriptome shotgun assembly. *Virus Res.* 2017; 240:1–7. <https://doi.org/10.1016/j.virusres.2017.07.012> PMID: 28723412.
18. Wu Q, Ding SW, Zhang Y, Zhu S. Identification of viruses and viroids by next-generation sequencing and homology-dependent and homology-independent algorithms. *Annu Rev Phytopathol.* 2015; 53(1):425–444. <https://doi.org/10.1146/annurev-phyto-080614-120030> PMID: 26047558.
19. Ito T, Suzaki K, Nakano M, Sato A. Characterization of a new apscaviroid from American persimmon. *Arch Virol.* 2013; 158(12):2629–2631. <https://doi.org/10.1007/s00705-013-1772-x> PMID: 23827974.
20. Zhang Z, Qi S, Nan T, Zhang X, Chen S, Zhu P, et al. Discovery of replicating circular RNAs by RNA-seq and computational algorithms. *PLoS Pathog.* 2014; 10(12):e1004553. <https://doi.org/10.1371/journal.ppat.1004553> PMID: 25503469.
21. Chiumenti M, Torchetti EM, Serio FD, Minafra A. Identification and characterization of a viroid resembling *Apple dimple fruit viroid* in fig (*Ficus carica* L.) by next generation sequencing of small RNAs. *Virus Res.* 2014; 188(1):54–59. <https://doi.org/10.1016/j.virusres.2014.03.026> PMID: 24704673.
22. Xu Q, Chen LL, Ruan X, Chen D, Zhu A, Chen C, et al. The draft genome of sweet orange (*Citrus sinensis*). *Nat Genet.* 2013; 45(1):59–66. <https://doi.org/10.1038/ng.2472> PMID: 23179022.
23. Wu GA, Prochnik S, Jenkins J, Salse J, Hellsten U, Murat F, et al. Sequencing of diverse mandarin, pummelo and orange genomes reveals complex history of admixture during citrus domestication. *Nat Biotechnol.* 2014; 32(7):656–662. <https://doi.org/10.1038/nbt.2906> PMID: 24908277
24. Bernad L, Duran-Vila N. A novel RT-PCR approach for detection and characterization of citrus viroids. *Mol Cell Probes.* 2006; 20(2):105–113. <https://doi.org/10.1016/j.mcp.2005.11.001> PMID: 16464560.
25. Pecman A, Kutnjak D, Gutiérrezzaguirre I, Adams I, Fox A, Boonham N, et al. Next generation sequencing for detection and discovery of plant viruses and viroids: Comparison of Two Approaches. *Front Microbiol.* 2017; 8:1998. <https://doi.org/10.3389/fmicb.2017.01998> PMID: 29081770.
26. Flores R, Randles JW, Barjoseph M, Diener TO. A proposed scheme for viroid classification and nomenclature. *Arch Virol.* 1998; 143(3): 623–629. PMID: 9572562
27. Koltunow AM, Rezaian A. A scheme for viroid classification. *Intervirology.* 1989; 30(4):194–201. <https://doi.org/10.1159/000150093> PMID: 2777536
28. Wu Q, Cao M, Su H, Atta S, Yang F, Wang X, et al. Molecular characterization and phylogenetic analysis of *Citrus viroid I-LSS* variants from citrus in Pakistan and China reveals their possible geographic origin. *Eur J Plant Pathol.* 2014; 139(1):13–17.
29. Puchta H, Ramm K, Luckinger R, Hadas R, Bar-Joseph M, Snger HL. Primary and secondary structure of *Citrus viroid IV* (CvD IV), a new chimeric viroid present in dwarfed grapefruit in Israel. *Nucleic Acids Res.* 1991; 19(23):6640. PMID: 1754400
30. Wang J, Boubourakas IN, Voloudakis AE, Agorastou T, Magripis G, Rucker TL, et al. Identification and characterization of known and novel viroid variants in the Greek national citrus germplasm collection: threats to the industry. *Eur J Plant Pathol.* 2013; 137(1):17–27.
31. Cao M, Wu Q, Yang F, Wang X, Li R, Zhou C, et al. Molecular characterization and phylogenetic analysis of *Citrus viroid VI* variants from citrus in China. *Eur J Plant Pathol.* 2017; 1–9.
32. Chaffai M, Serra P, Gandía M, Hernández C, Duran-Vila N. Molecular characterization of CEVd strains that induce different phenotypes in *Gynura aurantiaca*: structure-pathogenicity relationships. *Arch Virol.* 2007; 152(7):1283–1294. <https://doi.org/10.1007/s00705-007-0958-5> PMID: 17393070.
33. Wang X, Yan Z, Li Z, Tang K, Liu Y, Cao M, et al. Molecular, biological and phylogenetic analysis of Chinese isolates of *Hop stunt viroid* associated with citrus cachexia disease. *J Phytopathol.* 2010; 158(5):372–377.
34. Zhong X, Archual AJ, Amin AA, Ding B. A genomic map of viroid RNA motifs critical for replication and systemic trafficking. *Plant Cell.* 2008; 20(1):35–47. <https://doi.org/10.1105/tpc.107.056606> PMID: 18178767.
